# Supplementary material for: V(D)J recombination process and the Pre-B to immature B-cells transition are altered in Fanca−/− mice
Source: PubMed Central journal article supplement (PMC5121645; doi:10.1038/srep36906), 2016-11-24
Supplement: srep36906-s1.pdf [file srep36906-s1.pdf]

## SUPPLEMENTAL INFORMATIONS

**V(D)J recombination process and the Pre-B to immature B-cells transition are altered in *Fanca*<sup>-/-</sup> mice.**

Thuy Vy Nguyen, Patrycja Pawlikowska Virginie, Firlej, Filippo Rosselli and Saïd Aoufouchi

**Table S1. Proportions of different B cell compartments in BM**

**Table S2. Summary of V $\kappa$ -J $\kappa$ 1 junctions in the different experiments realized. The data were utilized to draw figure 2B and 2C.**

**Figure S1. Gating strategy used in TdT protein analysis by flow cytometry.** The TdT positive cells in pre-B (B220<sup>+</sup> IgM<sup>-</sup> CD43<sup>low</sup>) and pro-B (B220<sup>+</sup> IgM<sup>-</sup> CD43 CD25<sup>low</sup>) compartments derived from BM of *Fanca*<sup>-/-</sup> and WT mice.

**Figure S2. Gating strategy used for sorting pro-B and pre-b cells from BM of *Fanca*<sup>-/-</sup> and WT mice.**

**Figure S3. *Fanca*-deficient mice showed normal V $\kappa$  gene usage in V $\kappa$ -J $\kappa$ 4 rearrangements in BM IgM<sup>-</sup> B cells.** Analysis of V $\kappa$  gene family usage of total (A) and in-frame (B) V $\kappa$ -J $\kappa$ 4 rearrangements amplified from genomic DNA isolated from BM IgM<sup>-</sup> B cells of *Fanca*<sup>-/-</sup> and WT mice. V $\kappa$  families are displayed according to chromosomal order relative to the J $\kappa$  genes cluster. Data are from three independent pools of three mice per genotype (numbers of analyzed sequences are indicated in Table 1).

**Figure S4. Original images used for figure 3B.** Dotted lines enclose the images reported in Figure 3. In A, three different exposures of the same gel on the same film were showed. In B, the scan of the original PCR gel was presented, before the inversion of the black and white colors.

**Table S1. Proportions of different B cell compartments in BM**

|               | IgM <sup>-</sup> |                      | IgM <sup>+</sup> B220 <sup>low</sup> |                      | IgM <sup>+</sup> B220 <sup>high</sup> |                      |
|---------------|------------------|----------------------|--------------------------------------|----------------------|---------------------------------------|----------------------|
|               | WT               | Fanca <sup>-/-</sup> | WT                                   | Fanca <sup>-/-</sup> | WT                                    | Fanca <sup>-/-</sup> |
| Mean<br>(n=8) | 15.2             | 15.9                 | 5.3                                  | 4.6                  | 8.7                                   | 8.5                  |

**Table S2. Summary of V $\kappa$ -J $\kappa$ 1 junctions**

|       | <u>In-frame (no. seq)</u> |                             | <u>N-addition (no. seq)</u> |                             | <u>P-addition (no. seq)</u> |                             | <u>Total no. seq</u> |                             |
|-------|---------------------------|-----------------------------|-----------------------------|-----------------------------|-----------------------------|-----------------------------|----------------------|-----------------------------|
|       | WT                        | <i>Fanca</i> <sup>-/-</sup> | WT                          | <i>Fanca</i> <sup>-/-</sup> | WT                          | <i>Fanca</i> <sup>-/-</sup> | WT                   | <i>Fanca</i> <sup>-/-</sup> |
| Exp1  | 11                        | 16                          | 2                           | 2                           | 3                           | 1                           | 38                   | 39                          |
| Exp2  | 11                        | 17                          | 0                           | 3                           | 6                           | 2                           | 30                   | 32                          |
| Exp3  | 10                        | 20                          | 1                           | 6                           | 2                           | 3                           | 39                   | 43                          |
| Exp4  | 15                        | 14                          | 1                           | 1                           | 3                           | 0                           | 38                   | 25                          |
| Total | 47                        | 67                          | 4                           | 12                          | 14                          | 6                           | 145                  | 139                         |

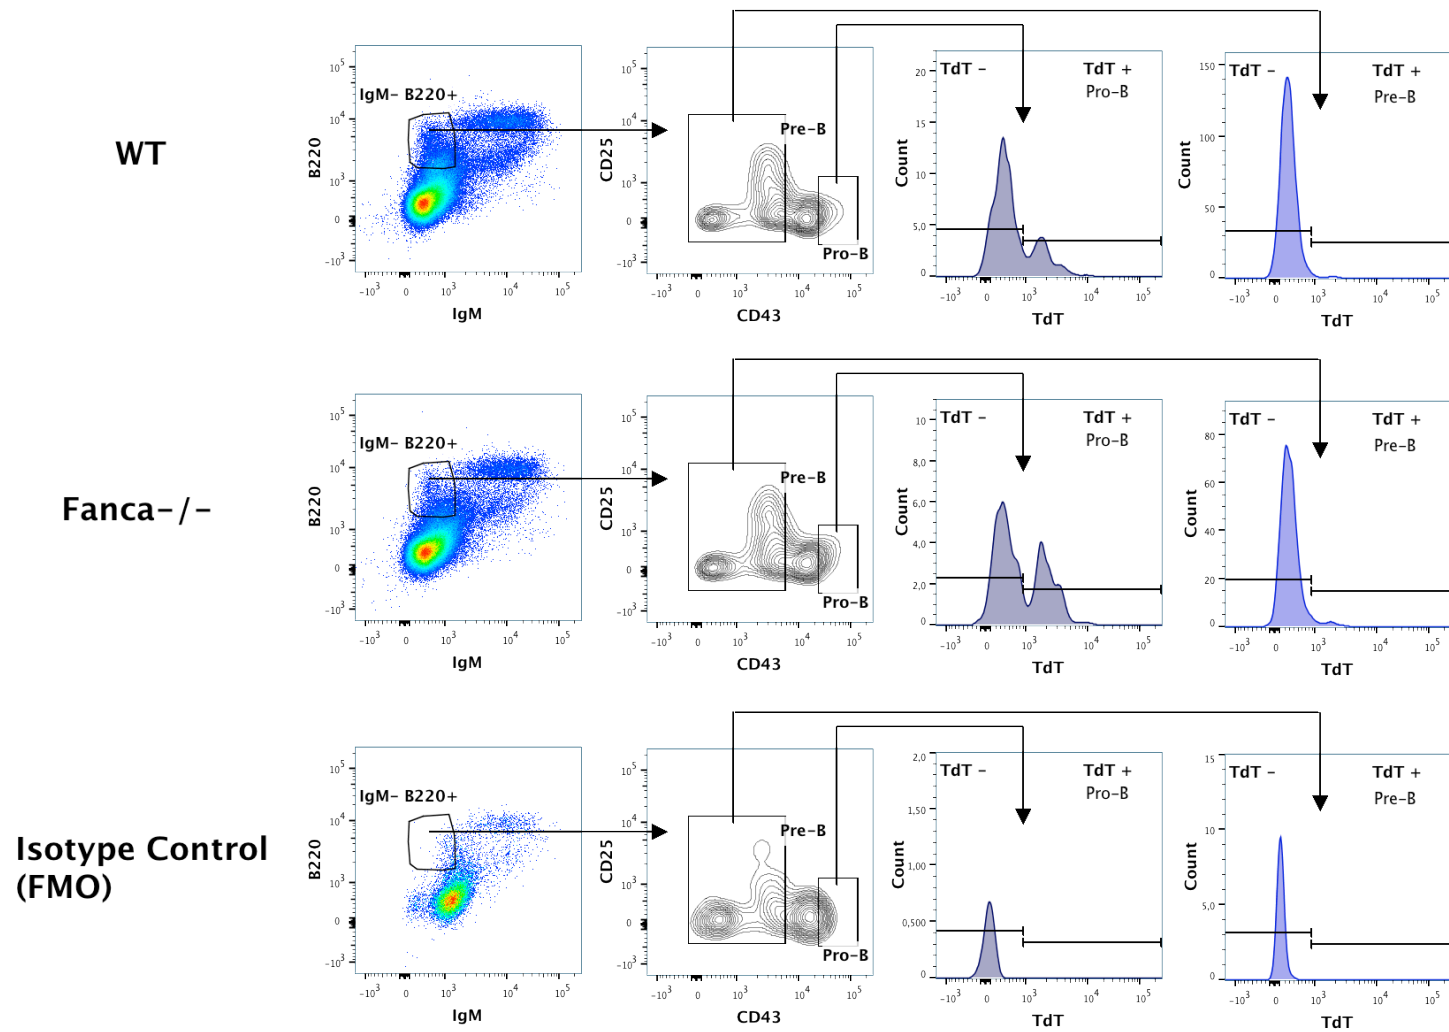

Supplemental Figure 1 – Nguyen et al.

**WT**

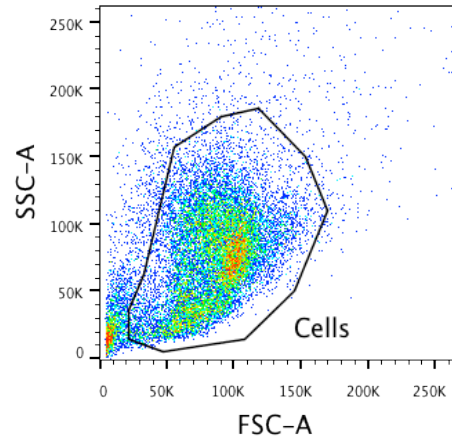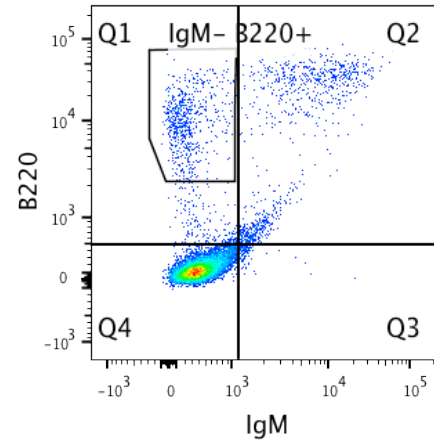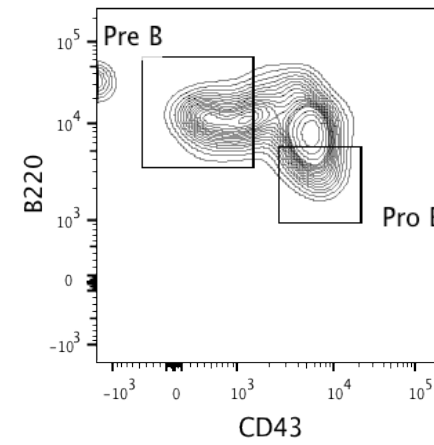

**Fanca<sup>-/-</sup>**

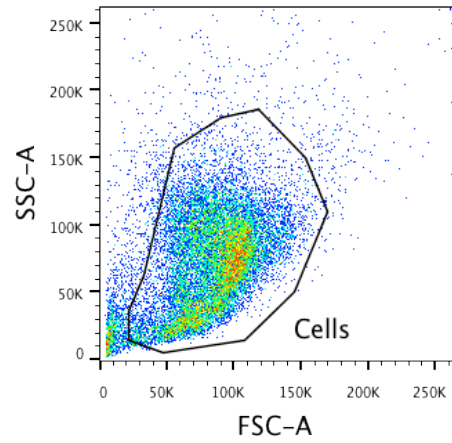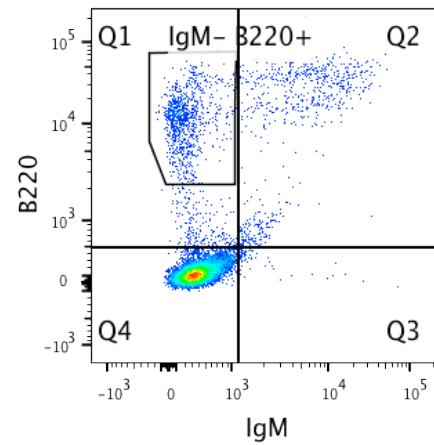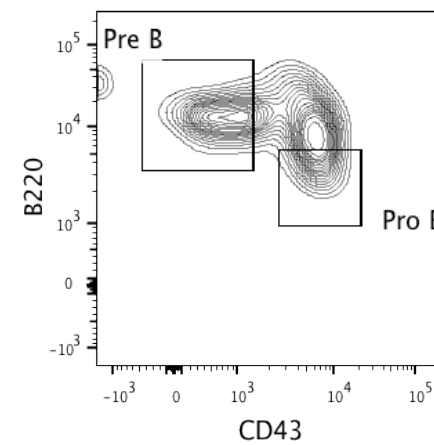

**Supplemental Figure 2 – Nguyen et al.**

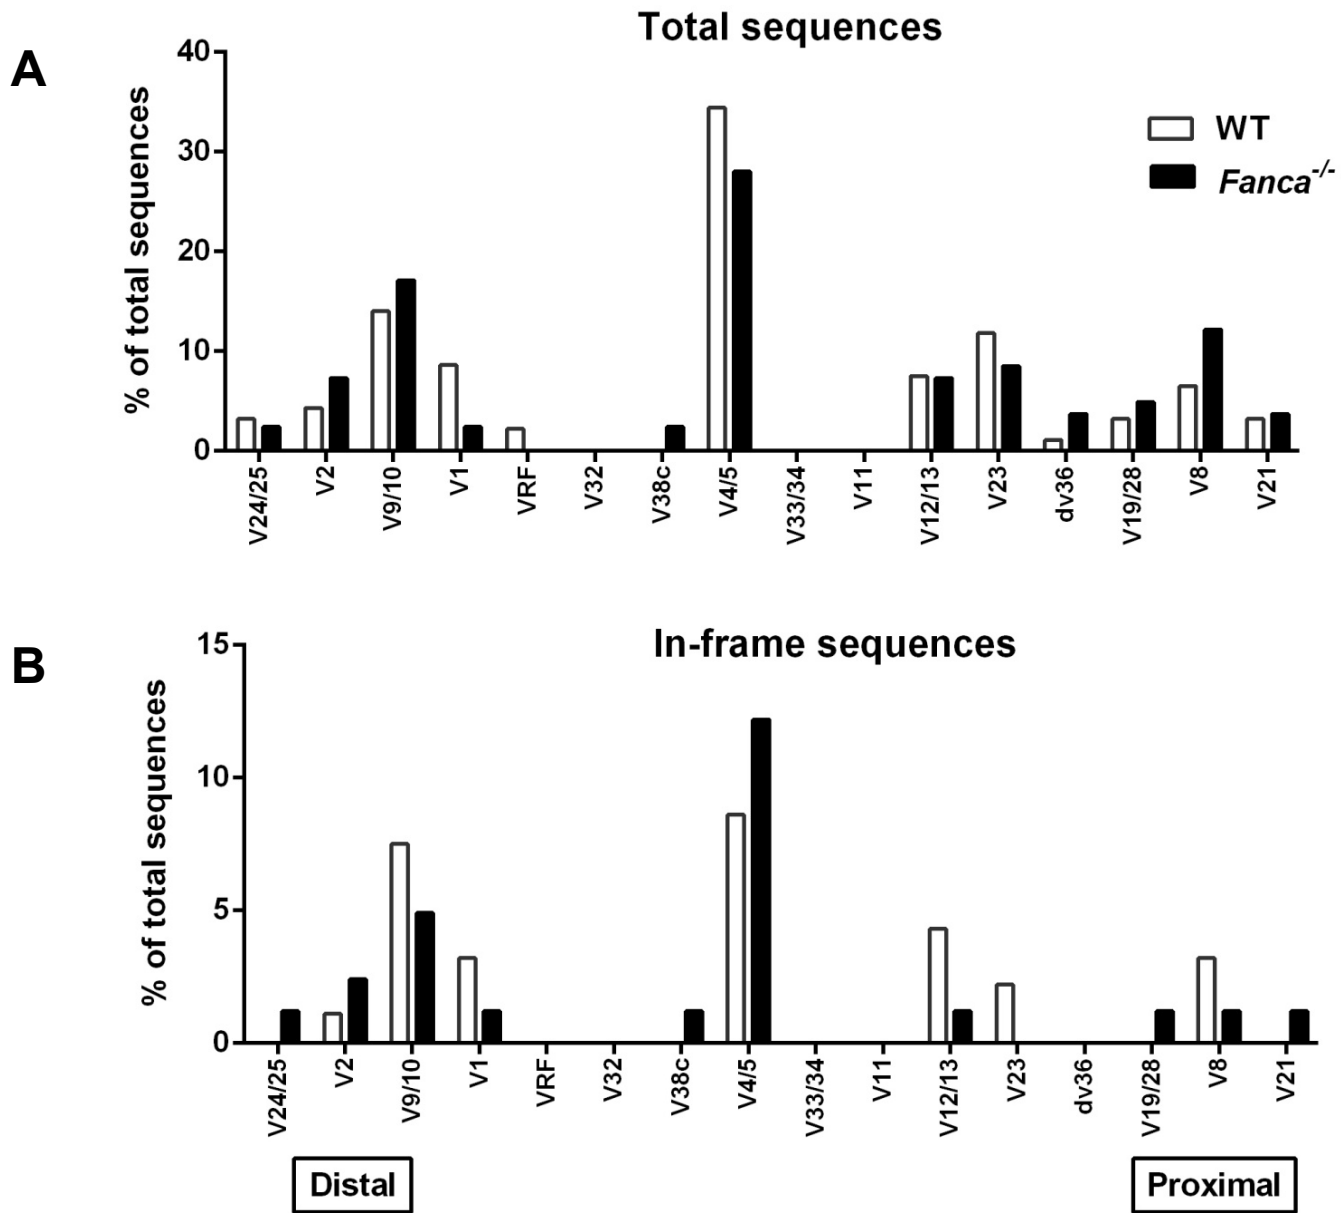

Supplemental Figure 3 – Nguyen et al.

**A**

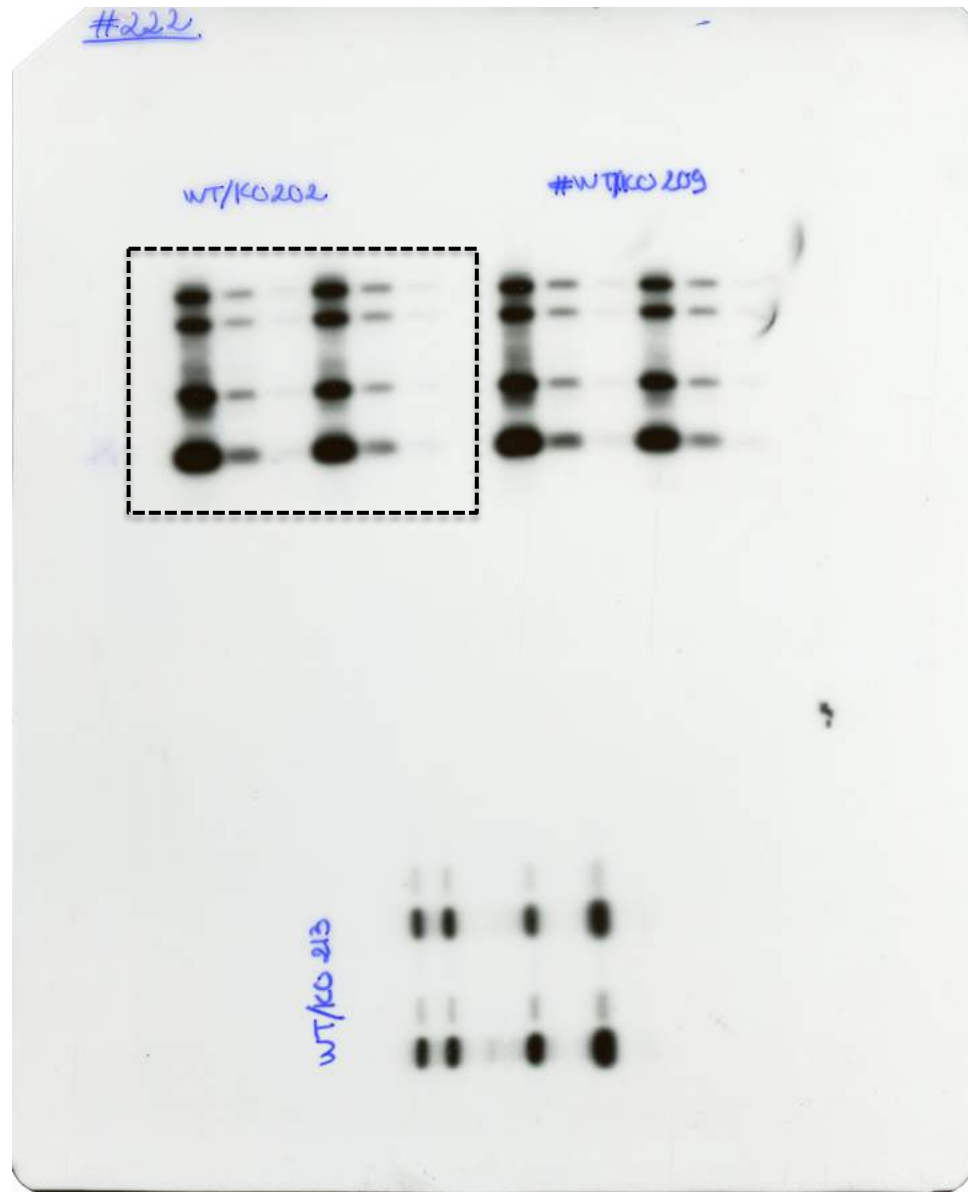

**B**

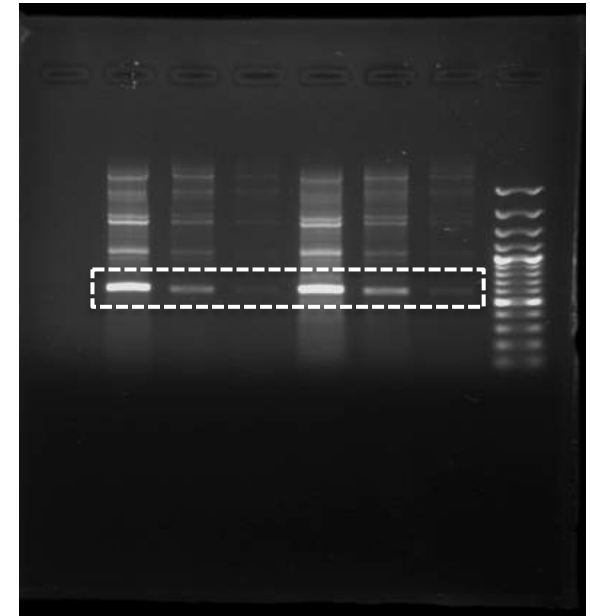

Supplemental Figure 4 – Nguyen et al.
